# Supplementary material
Source: MDPI journal article supplement (https://www.mdpi.com/2073-4352/5/2/252)
Supplement: s1 [file s1]

 
#------------------  SECTION 2. COMPOUND(S) DETAILS -------------------------#
 
data_shelx
 
_audit_creation_date                    2014-12-10T11:38:31-00:00
_audit_creation_method                  'WinGX routine CIF_UPDATE'
_audit_conform_dict_name                cif_core.dic
_audit_conform_dict_version             2.4.3
_audit_conform_dict_location            ftp://ftp.iucr.org/pub/cif_core.dic
_publ_requested_category                FI
 
#----------------------------------------------------------------------------#
#                   CHEMICAL INFORMATION                                     #
#----------------------------------------------------------------------------#
 
_chemical_name_systematic
;
 ?
;
_chemical_formula_moiety                'B1  O3  Ga1'
_chemical_formula_sum                   'B Ga O3'
_chemical_formula_weight                128.53
 
#----------------------------------------------------------------------------#
#                   UNIT CELL INFORMATION                                    #
#----------------------------------------------------------------------------#
 
_symmetry_cell_setting                  trigonal
_symmetry_space_group_name_H-M          R-3c
_symmetry_space_group_name_Hall         '-R 3 2"c'
_symmetry_Int_Tables_number             167
loop_ 
 _symmetry_equiv_pos_as_xyz 
 'x, y, z' 
 '-y, x-y, z' 
 '-x+y, -x, z' 
 'y, x, -z+1/2' 
 'x-y, -y, -z+1/2' 
 '-x, -x+y, -z+1/2' 
 'x+2/3, y+1/3, z+1/3' 
 '-y+2/3, x-y+1/3, z+1/3' 
 '-x+y+2/3, -x+1/3, z+1/3' 
 'y+2/3, x+1/3, -z+5/6' 
 'x-y+2/3, -y+1/3, -z+5/6' 
 '-x+2/3, -x+y+1/3, -z+5/6' 
 'x+1/3, y+2/3, z+2/3' 
 '-y+1/3, x-y+2/3, z+2/3' 
 '-x+y+1/3, -x+2/3, z+2/3' 
 'y+1/3, x+2/3, -z+7/6' 
 'x-y+1/3, -y+2/3, -z+7/6' 
 '-x+1/3, -x+y+2/3, -z+7/6' 
 '-x, -y, -z' 
 'y, -x+y, -z' 
 'x-y, x, -z' 
 '-y, -x, z-1/2' 
 '-x+y, y, z-1/2' 
 'x, x-y, z-1/2' 
 '-x+2/3, -y+1/3, -z+1/3' 
 'y+2/3, -x+y+1/3, -z+1/3' 
 'x-y+2/3, x+1/3, -z+1/3' 
 '-y+2/3, -x+1/3, z-1/6' 
 '-x+y+2/3, y+1/3, z-1/6' 
 'x+2/3, x-y+1/3, z-1/6' 
 '-x+1/3, -y+2/3, -z+2/3' 
 'y+1/3, -x+y+2/3, -z+2/3' 
 'x-y+1/3, x+2/3, -z+2/3' 
 '-y+1/3, -x+2/3, z+1/6' 
 '-x+y+1/3, y+2/3, z+1/6' 
 'x+1/3, x-y+2/3, z+1/6' 
 
_cell_length_a                          4.56590(10)
_cell_length_b                          4.56590(10)
_cell_length_c                          14.1764(4)
_cell_angle_alpha                       90
_cell_angle_beta                        90
_cell_angle_gamma                       120
_cell_volume                            255.946(11)
_cell_formula_units_Z                   6
_cell_measurement_temperature           100(2)
_cell_measurement_reflns_used           4393
_cell_measurement_theta_min             5.9067
_cell_measurement_theta_max             45.1564
_cell_measurement_wavelength            0.71073
 
#----------------------------------------------------------------------------#
#                   CRYSTAL INFORMATION                                      #
#----------------------------------------------------------------------------#
 
_exptl_crystal_description              pyramid
_exptl_crystal_colour                   'light yellow'
_exptl_crystal_size_max                 0.15
_exptl_crystal_size_mid                 0.11
_exptl_crystal_size_min                 0.07
_exptl_crystal_density_diffrn           5.003
_exptl_crystal_density_method           'not measured'
_exptl_crystal_F_000                    360
_exptl_special_details
;
 ?
;
 
#----------------------------------------------------------------------------#
#                   ABSORPTION CORRECTION                                    #
#----------------------------------------------------------------------------#
 
_exptl_absorpt_coefficient_mu           15.716
_exptl_absorpt_correction_type          Multi-Scan
_exptl_absorpt_correction_T_min         0.2059
_exptl_absorpt_correction_T_max         0.419
 
#----------------------------------------------------------------------------#
#                   DATA COLLECTION                                          #
#----------------------------------------------------------------------------#
 
_diffrn_ambient_temperature             100(2)
_diffrn_radiation_wavelength            0.71073
_diffrn_radiation_type                  MoK\a
_diffrn_radiation_monochromator         graphite
_diffrn_radiation_probe                 x-ray
_diffrn_reflns_av_R_equivalents         0.0353
_diffrn_reflns_av_unetI/netI            0.0114
_diffrn_reflns_number                   6025
_diffrn_reflns_limit_h_min              -8
_diffrn_reflns_limit_h_max              9
_diffrn_reflns_limit_k_min              -8
_diffrn_reflns_limit_k_max              9
_diffrn_reflns_limit_l_min              -26
_diffrn_reflns_limit_l_max              28
_diffrn_reflns_theta_min                5.91
_diffrn_reflns_theta_max                45.16
_diffrn_reflns_theta_full               45.16
_diffrn_measured_fraction_theta_full
                                        1
_diffrn_measured_fraction_theta_max
                                        1
_reflns_number_total                    242
_reflns_number_gt                       237
_reflns_threshold_expression            >2sigma(I)
 
#----------------------------------------------------------------------------#
#                   COMPUTER PROGRAMS USED                                   #
#----------------------------------------------------------------------------#
 
_computing_structure_solution           'SHELXS-97 (Sheldrick, 2008)'
_computing_structure_refinement         'SHELXL-97 (Sheldrick, 2008)'
_computing_molecular_graphics           'Ortep for Windows (Farrugia, 2012)'
_computing_publication_material
                                   'WinGX publication routines (Farrugia, 2012)'
 
#----------------------------------------------------------------------------#
#                   STRUCTURE SOLUTION
#----------------------------------------------------------------------------#
 
_atom_sites_solution_primary            direct
_atom_sites_solution_secondary          difmap
 
#----------------------------------------------------------------------------#
#                   REFINEMENT INFORMATION                                   #
#----------------------------------------------------------------------------#
 
_refine_special_details
;
 Refinement of F^2^ against ALL reflections.  The weighted R-factor wR and
 goodness of fit S are based on F^2^, conventional R-factors R are based
 on F, with F set to zero for negative F^2^. The threshold expression of
 F^2^ > 2sigma(F^2^) is used only for calculating R-factors(gt) etc. and is
 not relevant to the choice of reflections for refinement.  R-factors based
 on F^2^ are statistically about twice as large as those based on F, and R-
 factors based on ALL data will be even larger.
;
_refine_ls_structure_factor_coef        Fsqd
_refine_ls_matrix_type                  full
_refine_ls_weighting_scheme             calc
_refine_ls_weighting_details
         'calc w=1/[\s^2^(Fo^2^)+(0.0295P)^2^+0.1029P] where P=(Fo^2^+2Fc^2^)/3'
_refine_ls_extinction_method            SHELXL
_refine_ls_extinction_expression
                                    Fc^*^=kFc[1+0.001xFc^2^\l^3^/sin(2\q)]^-1/4^
_refine_ls_extinction_coef              0.0017(14)
_refine_ls_number_reflns                242
_refine_ls_number_parameters            11
_refine_ls_number_restraints            0
_refine_ls_number_constraints           0
_refine_ls_R_factor_all                 0.0155
_refine_ls_R_factor_gt                  0.0153
_refine_ls_wR_factor_ref                0.0433
_refine_ls_wR_factor_gt                 0.0432
_refine_ls_goodness_of_fit_ref          1.172
_refine_ls_restrained_S_all             1.172
_refine_ls_shift/su_max                 0
_refine_ls_shift/su_mean                0
_refine_diff_density_max                1.504
_refine_diff_density_min                -1.156
_refine_diff_density_rms                0.186
 
#----------------------------------------------------------------------------#
#                   ATOMIC TYPES, COORDINATES AND THERMAL PARAMETERS         #
#----------------------------------------------------------------------------#
 
loop_
    _atom_type_symbol
    _atom_type_description
    _atom_type_scat_dispersion_real
    _atom_type_scat_dispersion_imag
    _atom_type_scat_source
B B 0.0013 0.0007 'International Tables Vol C Tables 4.2.6.8 and 6.1.1.4'
O O 0.0106 0.006 'International Tables Vol C Tables 4.2.6.8 and 6.1.1.4'
Ga Ga 0.2307 1.6083 'International Tables Vol C Tables 4.2.6.8 and 6.1.1.4'
 
loop_
    _atom_site_label
    _atom_site_type_symbol
    _atom_site_fract_x
    _atom_site_fract_y
    _atom_site_fract_z
    _atom_site_U_iso_or_equiv
    _atom_site_adp_type
    _atom_site_occupancy
    _atom_site_symmetry_multiplicity
    _atom_site_calc_flag
    _atom_site_refinement_flags
    _atom_site_disorder_assembly
    _atom_site_disorder_group
Ga1 Ga 0 0 0 0.00262(8) Uani 1 6 d S . .
B1 B 0 0 0.25 0.0043(3) Uani 1 6 d S . .
O1 O 0.30201(12) 0.30201(12) 0.25 0.00391(11) Uani 1 2 d S . .
 
loop_
    _atom_site_aniso_label
    _atom_site_aniso_U_11
    _atom_site_aniso_U_22
    _atom_site_aniso_U_33
    _atom_site_aniso_U_23
    _atom_site_aniso_U_13
    _atom_site_aniso_U_12
Ga1 0.00232(9) 0.00232(9) 0.00321(11) 0 0 0.00116(5)
B1 0.0037(5) 0.0037(5) 0.0055(8) 0 0 0.0019(2)
O1 0.00291(15) 0.00291(15) 0.00534(18) 0.00024(6) -0.00024(6) 0.00104(15)
 
 
#----------------------------------------------------------------------------#
#                   MOLECULAR GEOMETRY                                       #
#----------------------------------------------------------------------------#
 
_geom_special_details
;
 All esds (except the esd in the dihedral angle between two l.s. planes)
 are estimated using the full covariance matrix.  The cell esds are taken
 into account individually in the estimation of esds in distances, angles
 and torsion angles; correlations between esds in cell parameters are only
 used when they are defined by crystal symmetry.  An approximate (isotropic)
 treatment of cell esds is used for estimating esds involving l.s. planes.
;
loop_
    _geom_bond_atom_site_label_1
    _geom_bond_atom_site_label_2
    _geom_bond_distance
    _geom_bond_site_symmetry_2
    _geom_bond_publ_flag
Ga1 O1 1.9875(2) 25 ?
Ga1 O1 1.9875(2) 13_444 ?
Ga1 O1 1.9875(2) 27_445 ?
Ga1 O1 1.9875(2) 15_554 ?
Ga1 O1 1.9875(2) 14_544 ?
Ga1 O1 1.9875(2) 26_455 ?
B1 O1 1.3789(5) . ?
B1 O1 1.3789(5) 3 ?
B1 O1 1.3789(5) 2 ?
O1 Ga1 1.9875(2) 7 ?
O1 Ga1 1.9875(2) 16_554 ?
 
loop_
    _geom_angle_atom_site_label_1
    _geom_angle_atom_site_label_2
    _geom_angle_atom_site_label_3
    _geom_angle
    _geom_angle_site_symmetry_1
    _geom_angle_site_symmetry_3
    _geom_angle_publ_flag
O1 Ga1 O1 180.00(3) 25 13_444 ?
O1 Ga1 O1 88.282(7) 25 27_445 ?
O1 Ga1 O1 91.718(7) 13_444 27_445 ?
O1 Ga1 O1 91.718(7) 25 15_554 ?
O1 Ga1 O1 88.282(7) 13_444 15_554 ?
O1 Ga1 O1 180 27_445 15_554 ?
O1 Ga1 O1 91.718(7) 25 14_544 ?
O1 Ga1 O1 88.282(7) 13_444 14_544 ?
O1 Ga1 O1 91.719(8) 27_445 14_544 ?
O1 Ga1 O1 88.281(8) 15_554 14_544 ?
O1 Ga1 O1 88.282(7) 25 26_455 ?
O1 Ga1 O1 91.718(7) 13_444 26_455 ?
O1 Ga1 O1 88.281(8) 27_445 26_455 ?
O1 Ga1 O1 91.719(8) 15_554 26_455 ?
O1 Ga1 O1 180.00(3) 14_544 26_455 ?
O1 B1 O1 120 . 3 ?
O1 B1 O1 120 . 2 ?
O1 B1 O1 120 3 2 ?
B1 O1 Ga1 117.055(14) . 7 ?
B1 O1 Ga1 117.055(14) . 16_554 ?
Ga1 O1 Ga1 125.89(3) 7 16_554 ?
 
# END of CIF
